# Supplementary figures and images for: RFTN1: an potential inhibitor of the immunity system in TME of breast cancer improving the tumor immune escape
Source: Research Square preprint supplement (doi:10.21203/rs.3.rs-4243522/v1), 2024-04-16

A

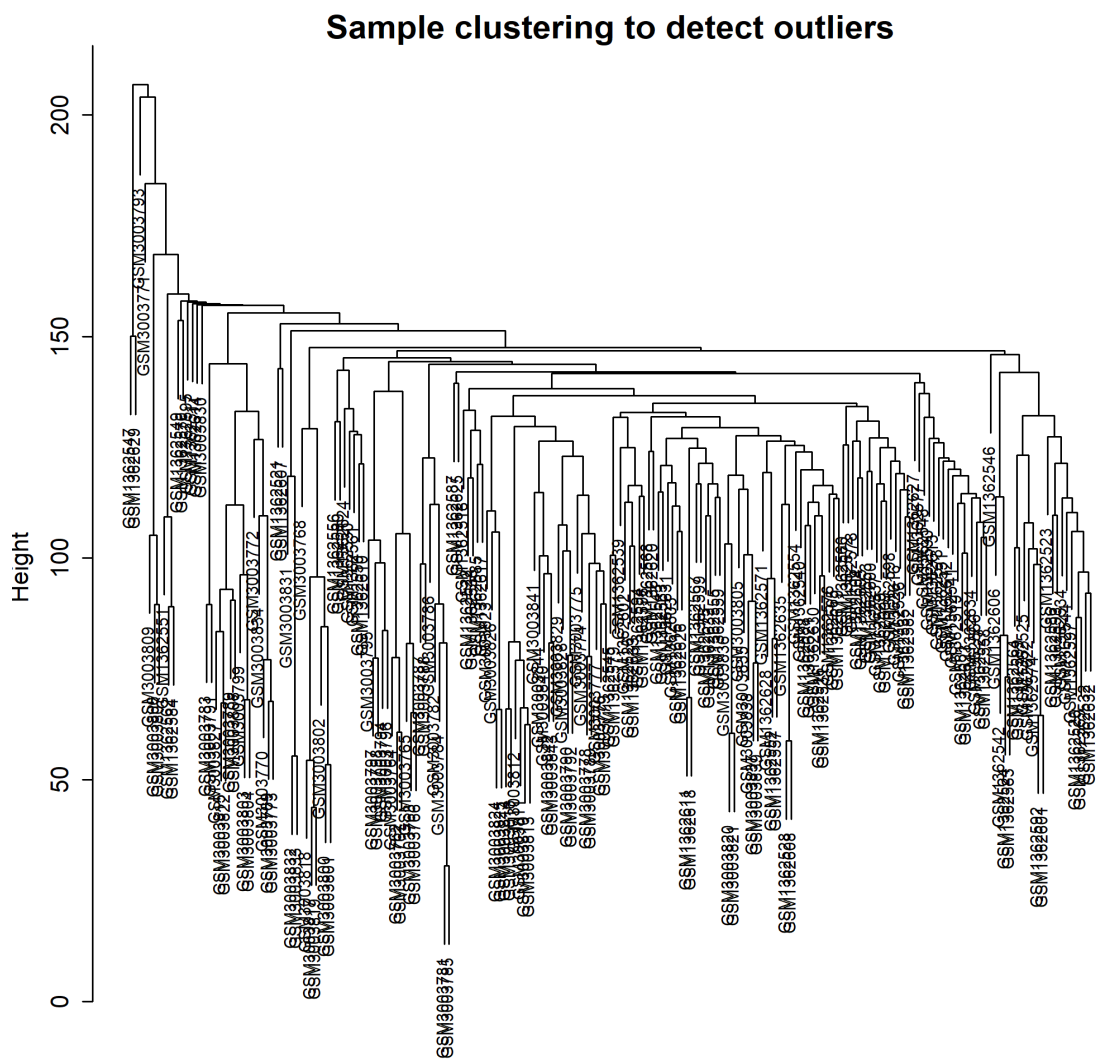

B

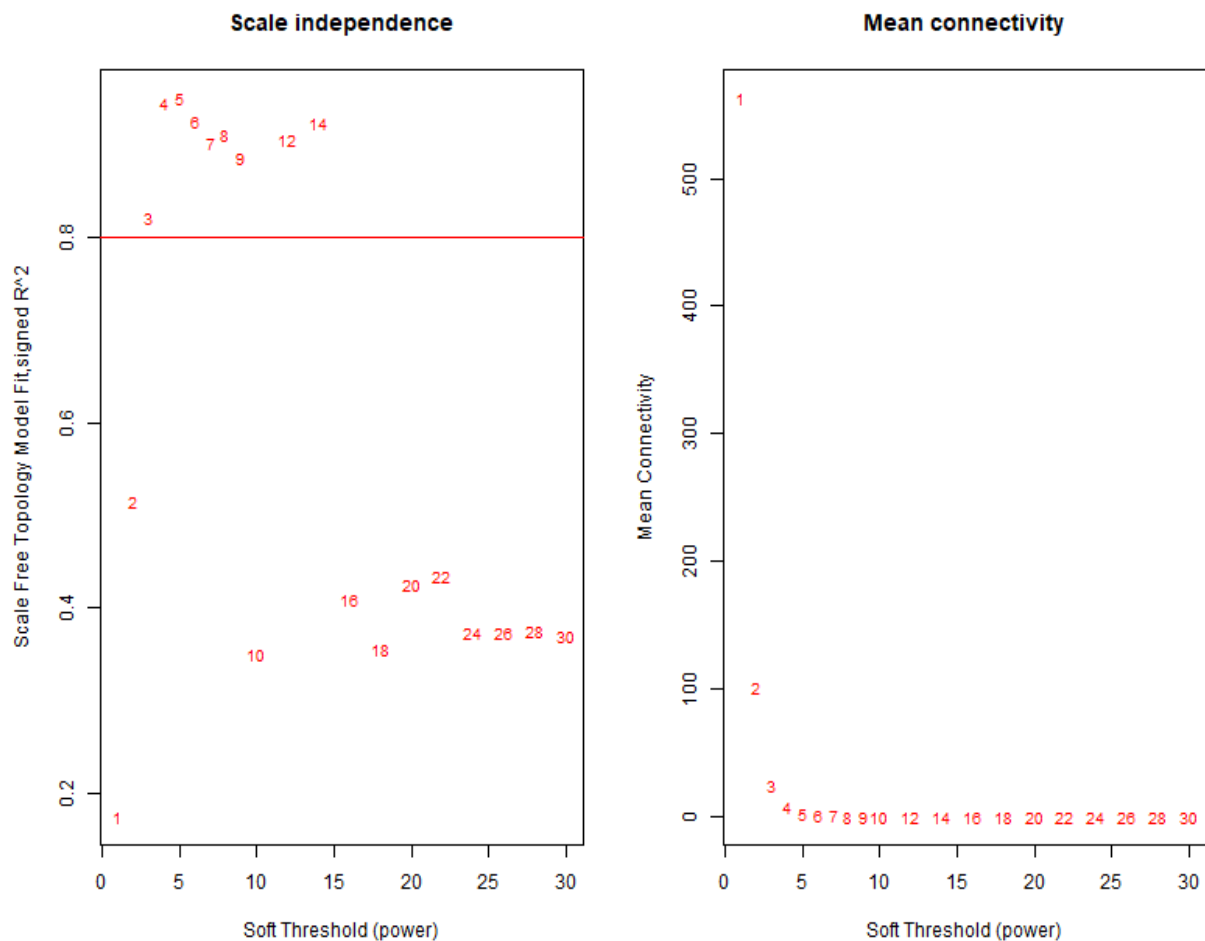

Supplement: Supplementary file 1 [file extendfigure1.pdf › extendfigure1.pdf]

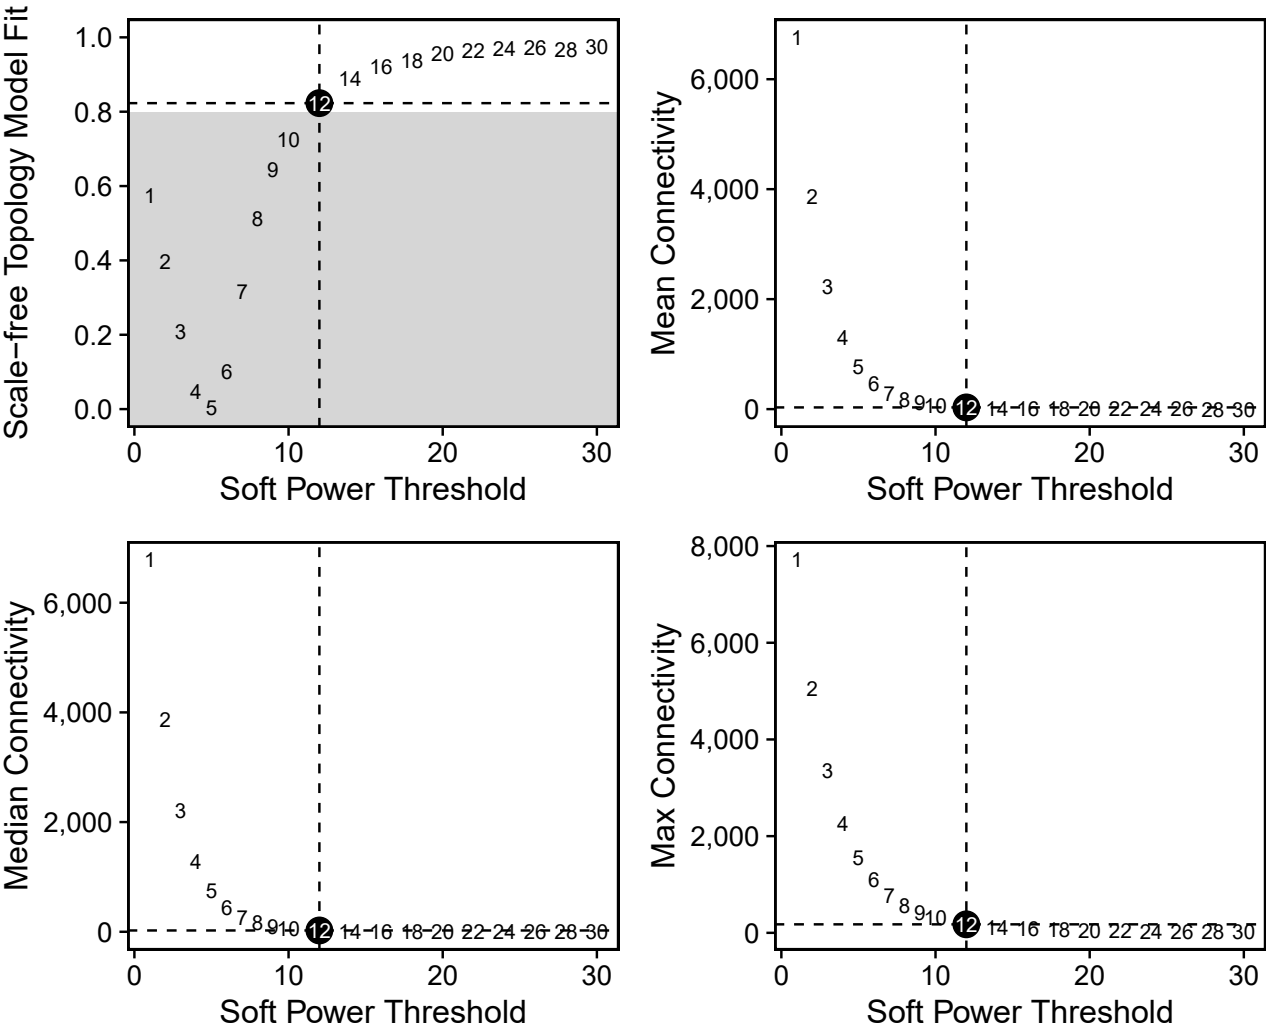

Supplement: Supplementary file 2 [file extendfigure2.pdf › extendfigure2.pdf]
